# Supplementary material for: Clinical practices underlie COVID-19 patient respiratory microbiome composition and its interactions with the host
Source: bioRxiv or medRxiv preprint supplement (doi:10.1101/2020.12.23.20248425), 2021-06-24

# Supplementary Figure 3

**a**

## Significant differences among ventilation types

Test: Likelihood ratio test; Design:  $\sim$  ventilation\_ongoing; Reduced model:  $\sim$  1

Non-invasive Invasive

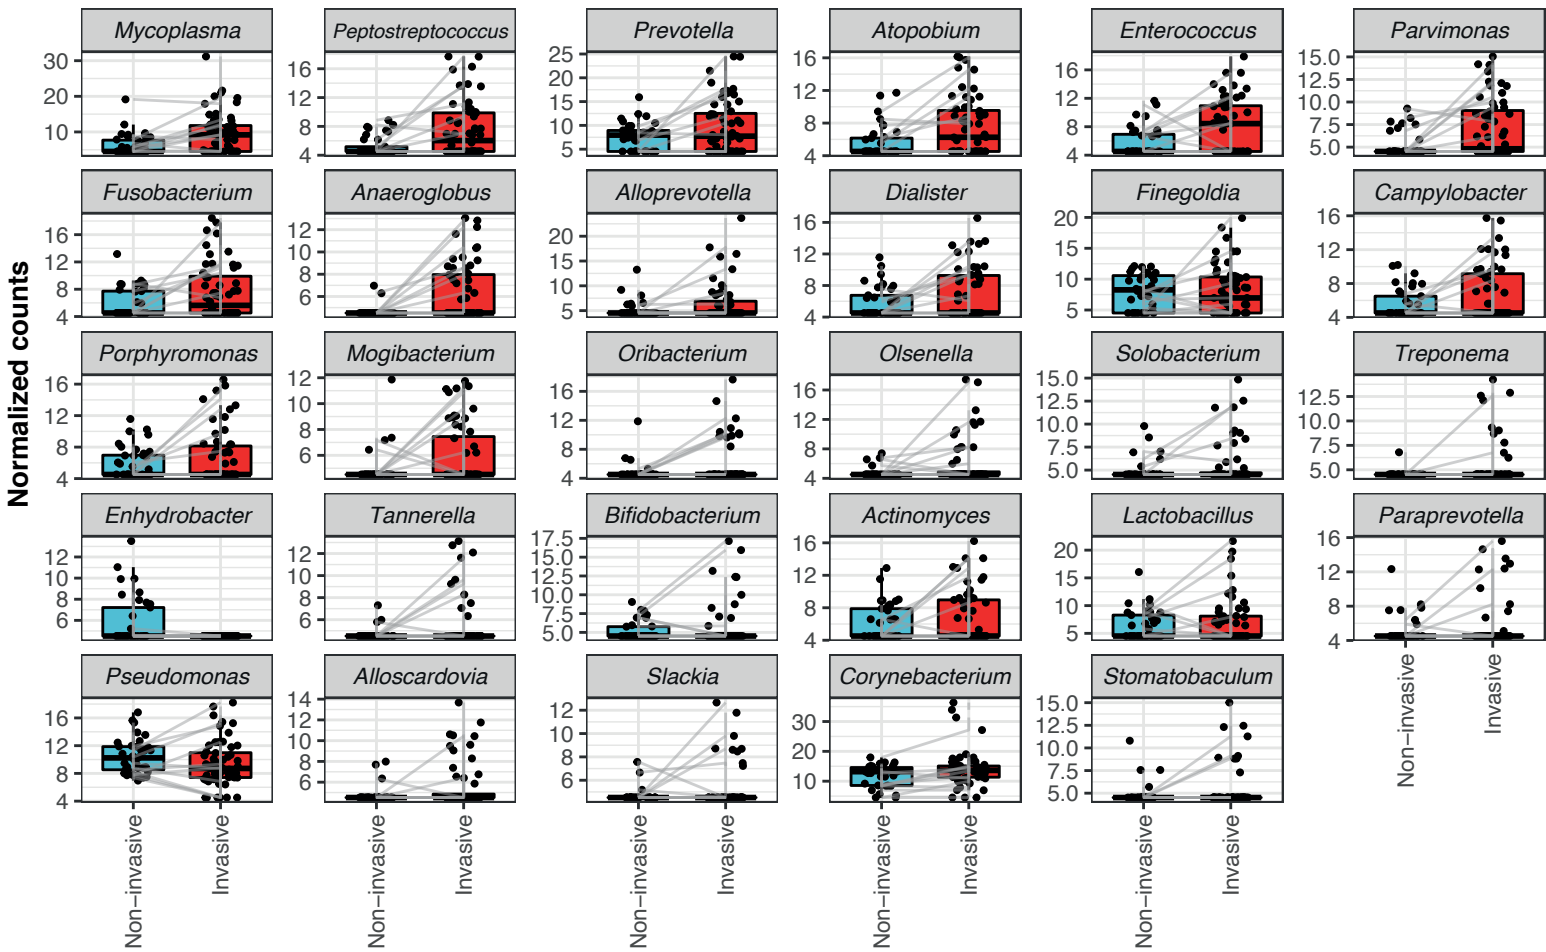

**b**

## Significant differences among ventilation types, controlling for antibiotics

Test: Likelihood ratio test; Design:  $\sim$  meropenem\_treatment + ceftriaxone\_ongoing + ventilation\_ongoing; Reduced model:  $\sim$  meropenem\_treatment + ceftriaxone\_ongoing

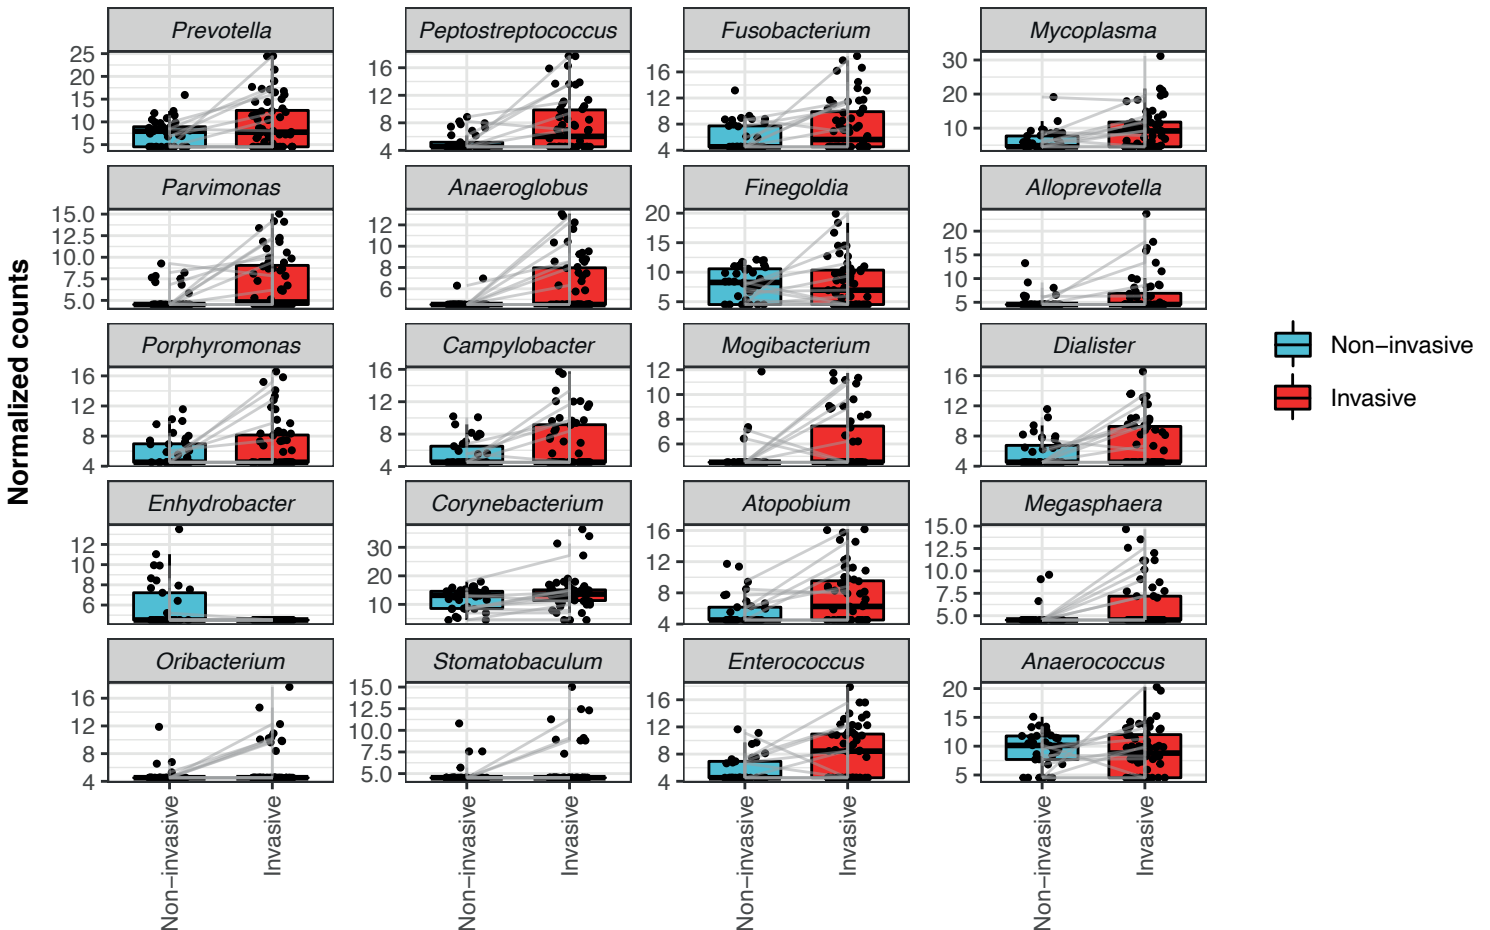

Supplement: Supplementary file [file media-3.pdf]
