# Supplementary material for: Clinical practices underlie COVID-19 patient respiratory microbiome composition and its interactions with the host
Source: bioRxiv or medRxiv preprint supplement (doi:10.1101/2020.12.23.20248425), 2021-06-24

# Supplementary Figure 4

**Cell types associated to bacteria (COVID-19)**

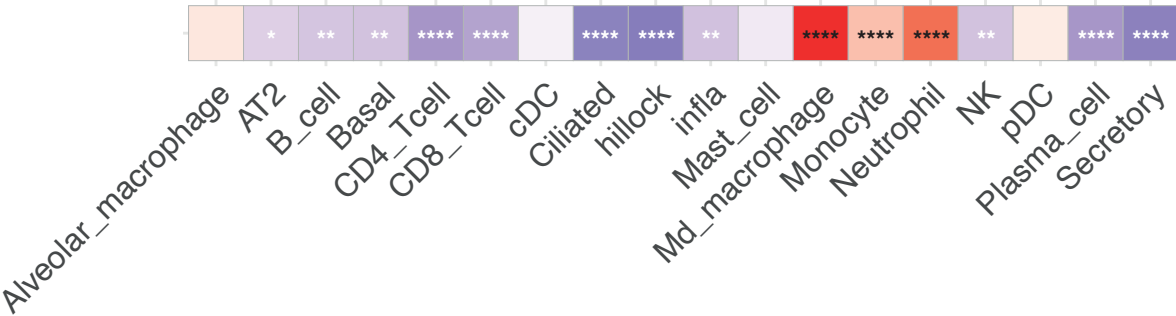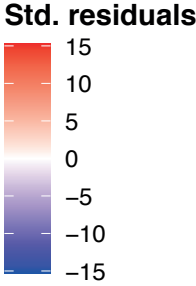

**Cell types associated to bacteria (controls)**

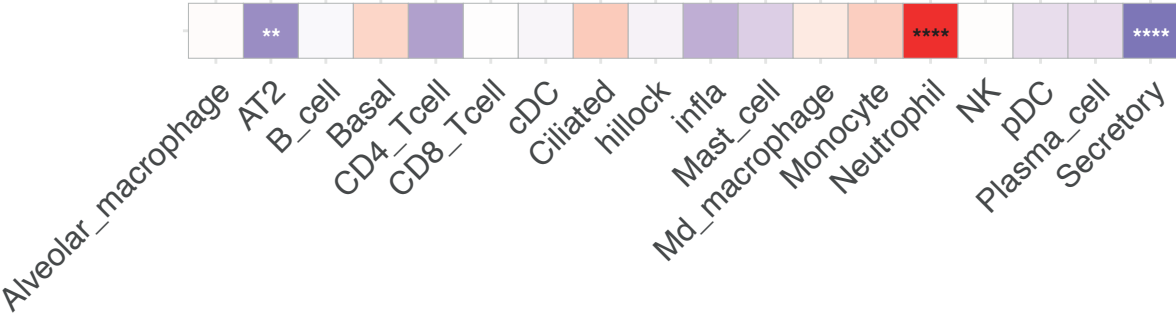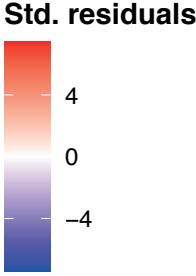

Supplement: Supplementary file [file media-4.pdf]
